# Supplementary material for: Renal cancer: new models and approach for personalizing therapy
Source: Springer Nature journal article supplement (doi:10.1186/s13046-018-0874-4), 2018-09-05
Supplement: MOESM2 [file 16100066]

**A****Panel 1**

| SAMPLES            | 1286 |
|--------------------|------|
| Tumor free         | 1013 |
| M1                 | 130  |
| Recurrent patients | 143  |

**Panel 2**

| SAMPLES            | 57 |
|--------------------|----|
| Tumor free         | 37 |
| M1                 | 6  |
| Recurrent patients | 14 |

**B**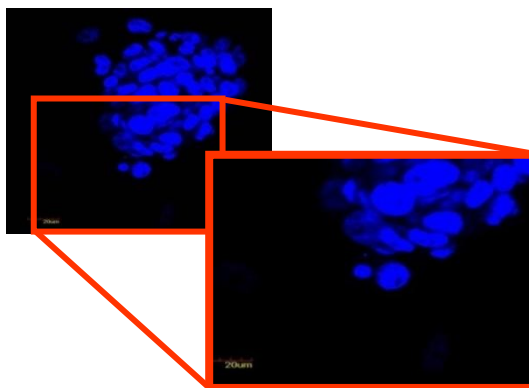**C**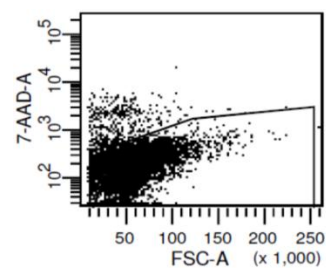**D**

| CD45  | CD90 | CD24   | CD10   |
|-------|------|--------|--------|
| < 10% | <10% | 25-60% | 1%-20% |

| CD44   | EpCAM  | CD146  | CK8/18 |
|--------|--------|--------|--------|
| 30-80% | 10-70% | 1%-30% | 40-70% |

**E**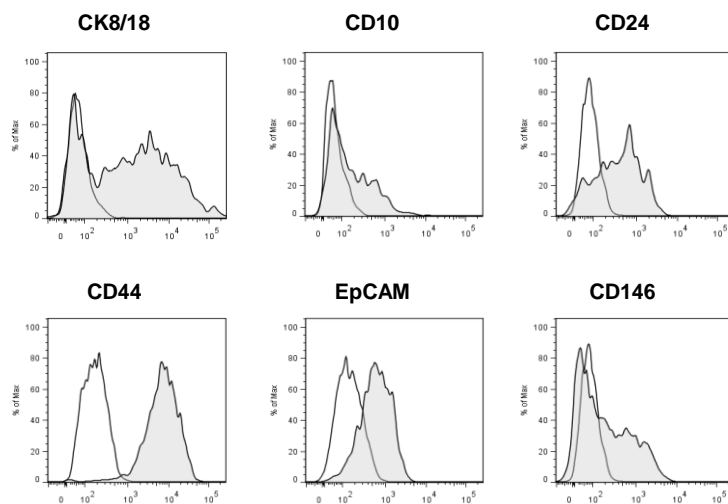**F**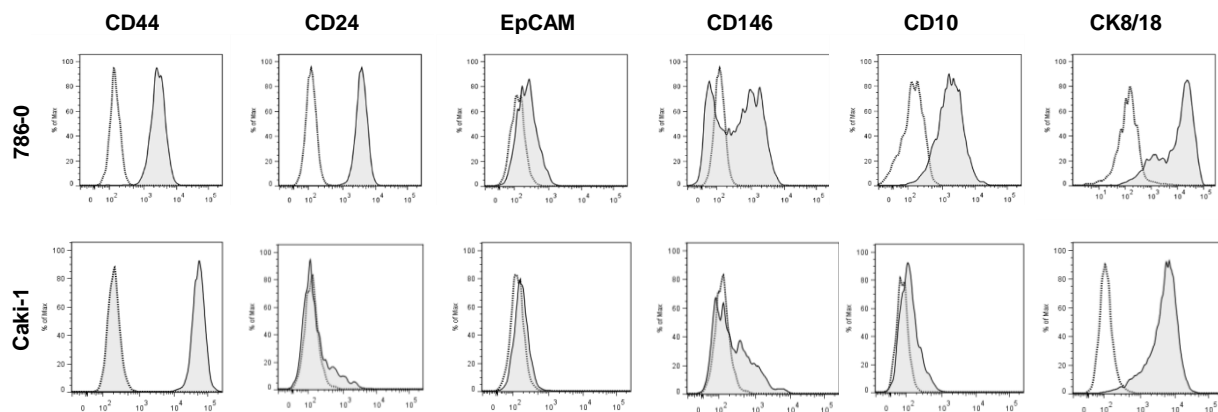**Figure S1**
