# Supplementary material for: Renal cancer: new models and approach for personalizing therapy
Source: Springer Nature journal article supplement (doi:10.1186/s13046-018-0874-4), 2018-09-05
Supplement: MOESM5 [file 16100066]

### A 3 days of culture after enzymatic dissociation

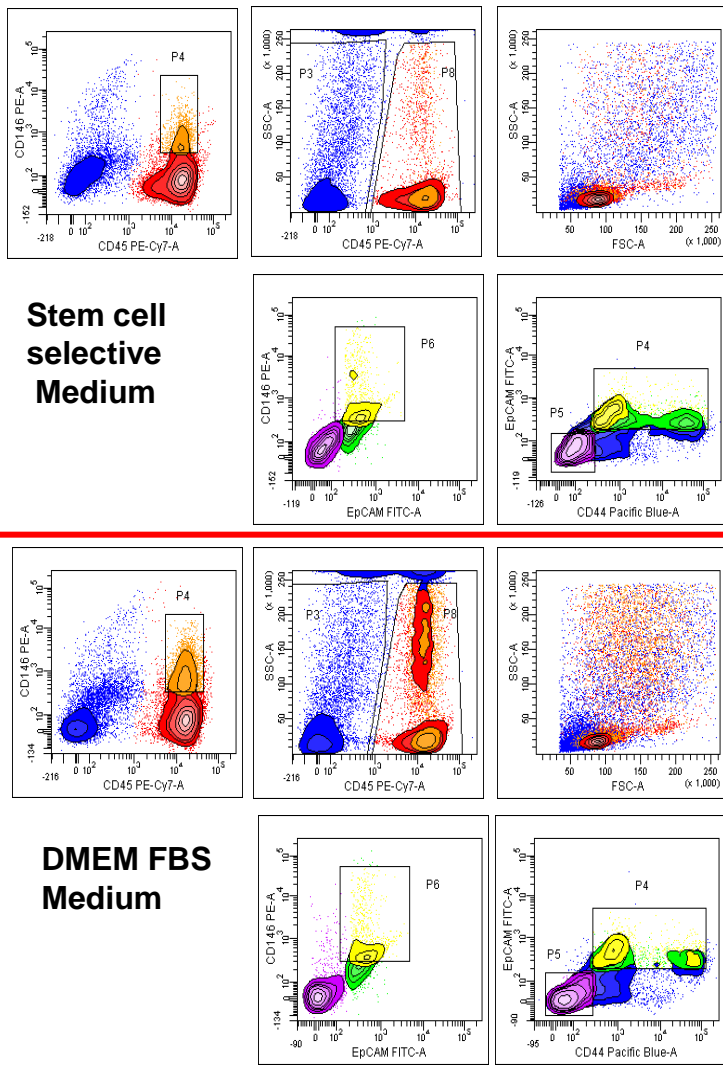

### B

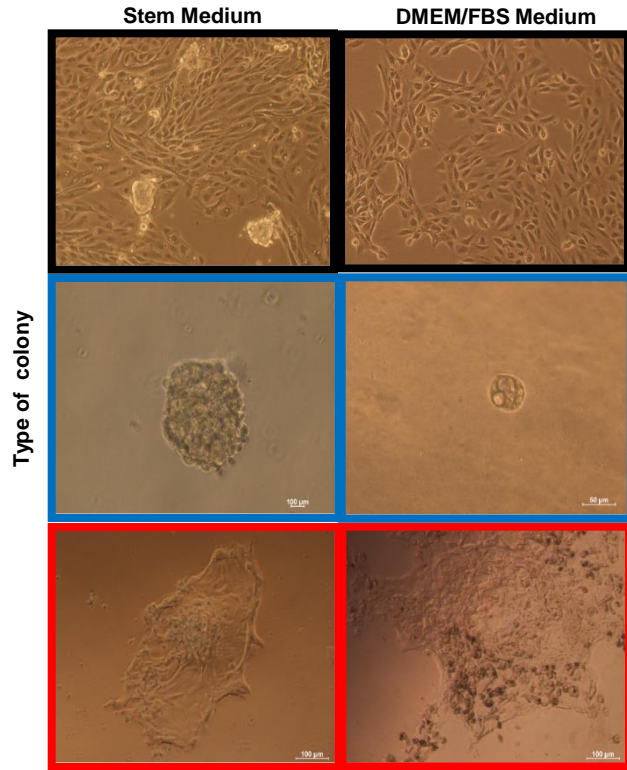

### C

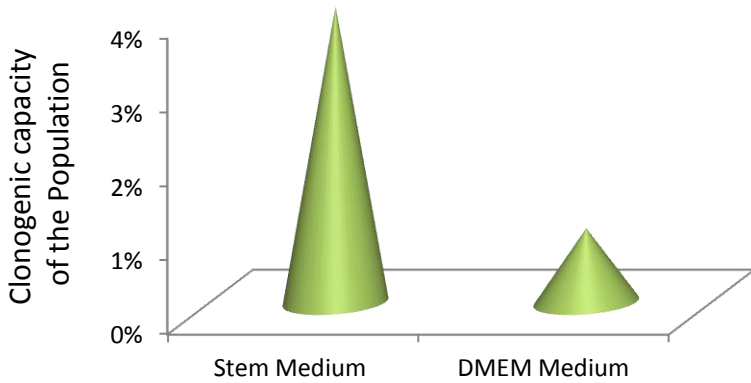

### D

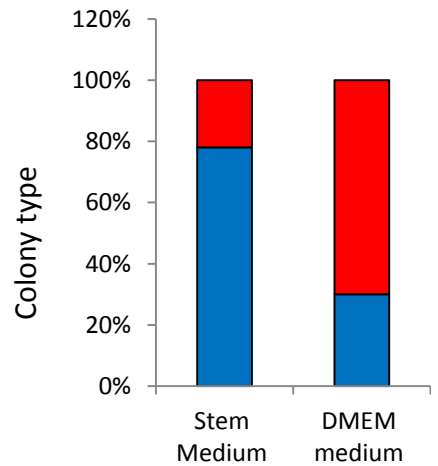

**Figure S4**
