# Supplementary material for: Renal cancer: new models and approach for personalizing therapy
Source: Springer Nature journal article supplement (doi:10.1186/s13046-018-0874-4), 2018-09-05
Supplement: MOESM6 [file 16100066]

# Stem cell selective Medium

3 day after enzymatic dissociation Post-Sorting-clonogenesis

CD44<sup>+</sup>/CD146<sup>+</sup>/EPCAM<sup>+</sup>

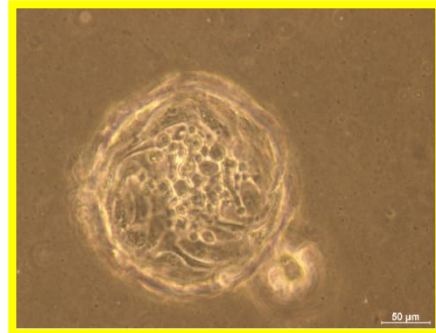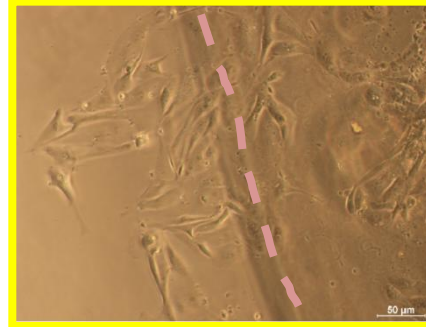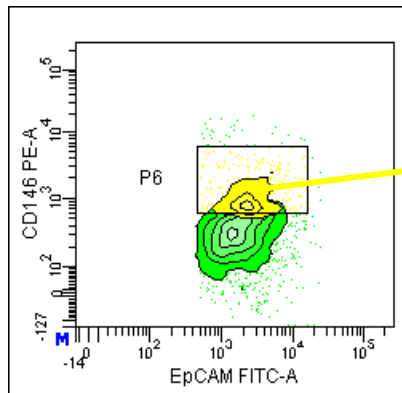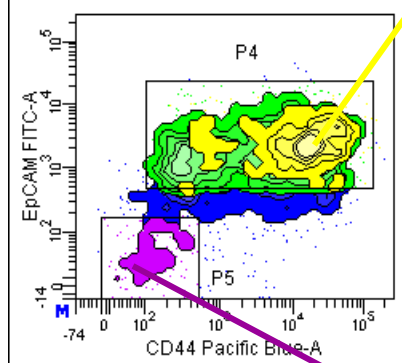

CD44<sup>-</sup>/CD146<sup>-</sup>/EPCAM<sup>-</sup>

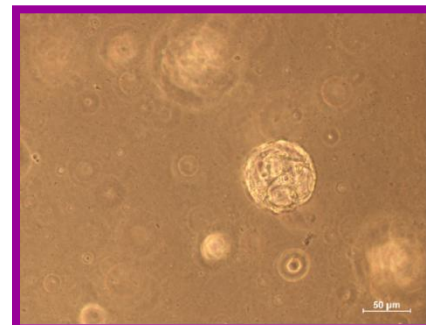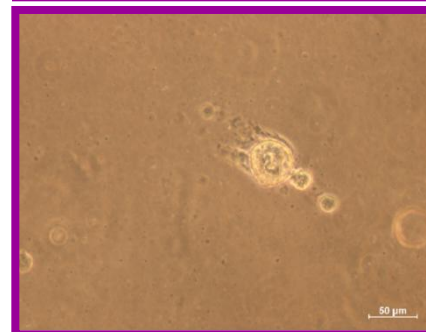

Figure S5
