# Supplementary material for: Renal cancer: new models and approach for personalizing therapy
Source: Springer Nature journal article supplement (doi:10.1186/s13046-018-0874-4), 2018-09-05
Supplement: MOESM8 [file 16100066]

| SAMPLE N° | SEX | AGE | G | T  | N | M | STAGE |
|-----------|-----|-----|---|----|---|---|-------|
| S1        | F   | 79  | 1 | 1b | x | 0 | 1     |
| S2        | M   | 39  | 1 | 1b | x | 0 | 1     |
| S3        | F   | 53  | 2 | 1b | x | 0 | 1     |
| S4        | M   | 38  | 2 | 2b | x | 0 | 2     |
| S5        | M   | 62  | 2 | 2a | x | 0 | 2     |
| S6        | M   | 49  | 2 | 1b | x | 0 | 1     |
| S7        | F   | 43  | 2 | 3a | x | 0 | 3     |
| S8        | F   | 45  | 2 | 2a | 0 | 0 | 2     |
| S9        | M   | 68  | 2 | 1b | x | 0 | 1     |
| S10       | M   | 64  | 3 | 3a | 0 | 0 | 3     |
| S11       | M   | 62  | 3 | 4  | 0 | 0 | 4     |
| S12       | M   | 55  | 3 | 2b | x | 0 | 2     |
| S13       | F   | 72  | 3 | 3a | 0 | 0 | 3     |
| S14       | M   | 63  | 3 | 3b | 0 | 0 | 3     |
| S15       | F   | 65  | 3 | 1b | x | 0 | 1     |
| S16       | M   | 68  | 3 | 3a | x | 0 | 3     |
| S17       | M   | 74  | 3 | 1b | x | 0 | 1     |
| S18       | M   | 63  | 4 | 4  | 0 | 1 | 4     |
| S19       | M   | 82  | 4 | 4  | 1 | 0 | 4     |
| S20       | M   | 37  | 4 | 2a | x | 0 | 2     |

**Table S2**
