# Supplementary material for: Renal cancer: new models and approach for personalizing therapy
Source: Springer Nature journal article supplement (doi:10.1186/s13046-018-0874-4), 2018-09-05
Supplement: MOESM9 [file 16100066]

## ENDPOINTS ANALYZED BY RPPA

|                                   |                                           |                                 |
|-----------------------------------|-------------------------------------------|---------------------------------|
| 4E-BP1 (S65)                      | EGFR (Y1068)                              | p90RSK (S380)                   |
| 4E-BP1 (T37/46)                   | EGFR (Y1148)                              | Paxillin (Y118)                 |
| 4E-BP1 (T70)                      | EGFR (Y1173)                              | PDGFR $\alpha$ (Y754)           |
| AKT                               | EGFR (Y992)                               | PDGFR $\beta$                   |
| AKT (S473)                        | eIF4E (S209)                              | PDGFR $\beta$ (Y716)            |
| AKT (T308)                        | eIF4G (S1108)                             | PDGFR $\beta$ (Y751)            |
| ALK                               | Elk-1 (S383)                              | PKD1 (S241)                     |
| ALK (Y1586)                       | ErbB2 (Y1248)                             | PI3K                            |
| ALK (Y1604)                       | ErbB3                                     | PI3Kp110 $\gamma$               |
| AMPK $\alpha$ (S485)              | ErbB3 (Y1289)                             | PKCpan/ $\beta$ II (S660)       |
| AMPK $\beta$ (S108)               | ErbB4                                     | PKC $\alpha$ (S657)             |
| a-RAF (S299)                      | ERG                                       | PKC $\alpha/\beta$ (T638/641)   |
| Ask1 (S83)                        | ERK1/2 (T202/Y204)                        | PKC $\delta$ (T505)             |
| Aurora A (T288)/B (T232)/C (T198) | Ezrin (T567)/Radixin (T564)/Moesin (T558) | PKC $\zeta/\lambda$ (T410/403)  |
| Aurora A/AIK                      | FAK (Y397)                                | PKC $\theta$ (T538)             |
| $\beta$ Catenin (S33/37/T41)      | FAK (Y576/577)                            | PLC $\gamma$ 1 (Y783)           |
| $\beta$ Catenin (T41/S45)         | GSK-3 $\alpha/\beta$ (S21/9)              | PRAS40 (T246)                   |
| BAD                               | GSK-3 $\alpha/\beta$ (S279/216)           | RANK                            |
| BAD (S112)                        | HIF-1 $\alpha$                            | RANKL                           |
| BAD (S136)                        | HSP27 (S82)                               | RSK3 (T356/S360)                |
| BAK                               | HSP70                                     | S6 Ribosomal Protein (S235/236) |
| BAX                               | HSP90a (T5/7)                             | S6 Ribosomal Protein (S240/244) |
| Bcl-2 (S70)                       | IGF-1R (Y1131)/IR (Y1146)                 | SEK1/MKK4 (S80)                 |
| Bcl-2 (T56)                       | IGF-1R (Y1135/1136)/IR (Y1150/1151)       | SGK1 (S78)                      |
| Bcl-xL                            | I $\kappa$ B $\alpha$ (S32/36)            | Sox2                            |
| b-RAF (S445)                      | IL-6                                      | Src (Y527)                      |
| cKIT                              | IRS-1 (S612)                              | Src family (Y416)               |
| cKIT (Y703)                       | KRAS                                      | STAT3                           |
| c-Myc                             | MARCKS (S152/156)                         | STAT3 (S727)                    |
| c-MET (Y1234/1235)                | MDM2 (S166)                               | STAT3 (Y705)                    |
| c-RAF (S259)                      | MEK1/2 (S217/221)                         | STAT5                           |
| c-RAF (S338)                      | mTOR (S2448)                              | STAT5 (Y694)                    |
| Cofilin (S3)                      | mTOR (S2481)                              | Survivin                        |
| Cox2                              | Nanog                                     | TGF $\beta$                     |
| CrkII (Y221)                      | N-Cadherin                                | Tuberin/TSC2 (Y1571)            |
| CrkL (Y207)                       | p38 MAPK (T180/Y182)                      | VEGFR2                          |
| Cyclin D1                         | p53 (S15)                                 | VEGFR2 (Y1175)                  |
| E-Cadherin                        | p53 (S46)                                 | VEGFR2 (Y951)                   |
| EGFR                              | p70 S6K (S371)                            | VEGFR2 (Y996)                   |
| EGFR (S1046/1047)                 | p70 S6K (T389)                            | Vimentin                        |
| EGFR (Y1045)                      | p70 S6K (T412)                            | Wnt5a/b                         |

**Table S3**
