# Supplementary material for: Renal cancer: new models and approach for personalizing therapy
Source: Springer Nature journal article supplement (doi:10.1186/s13046-018-0874-4), 2018-09-05
Supplement: MOESM10 [file 16100066]

**A**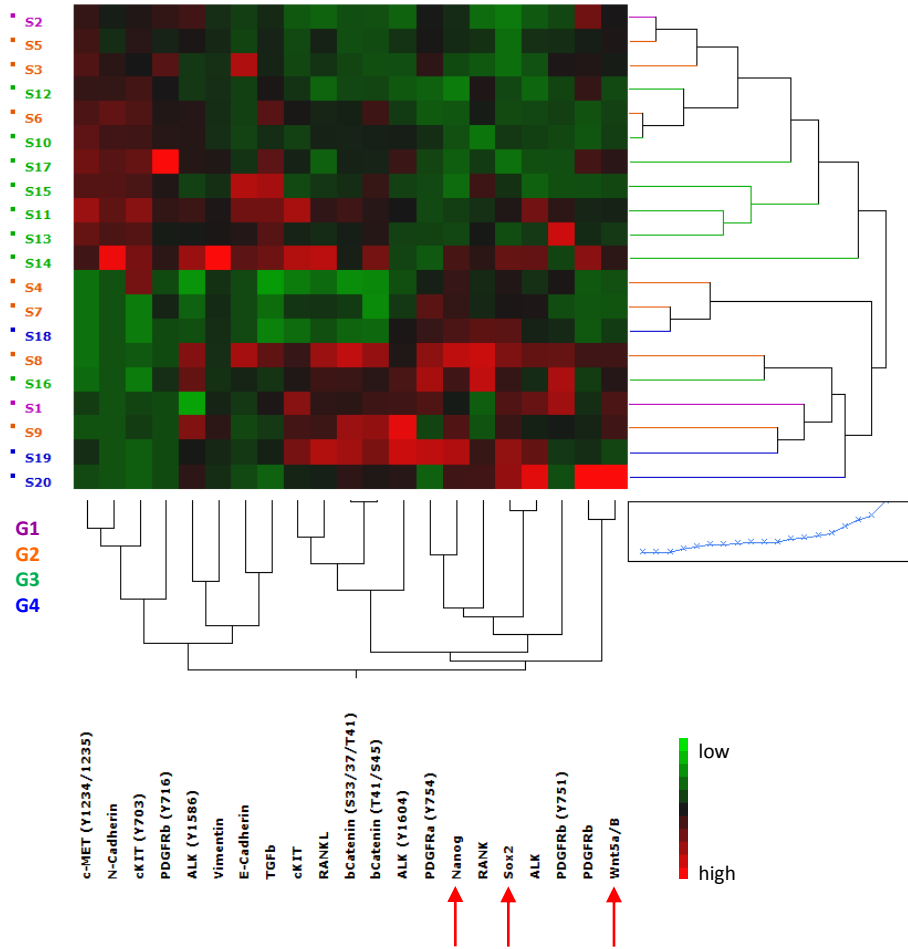**B**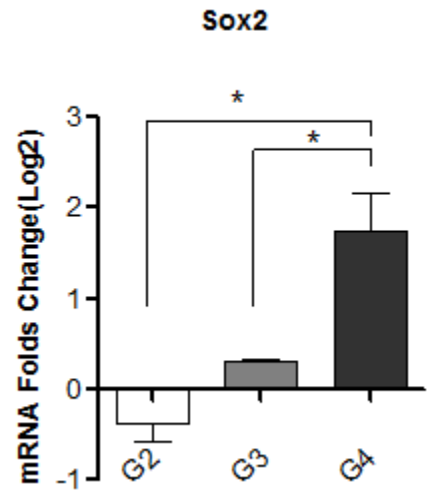**C**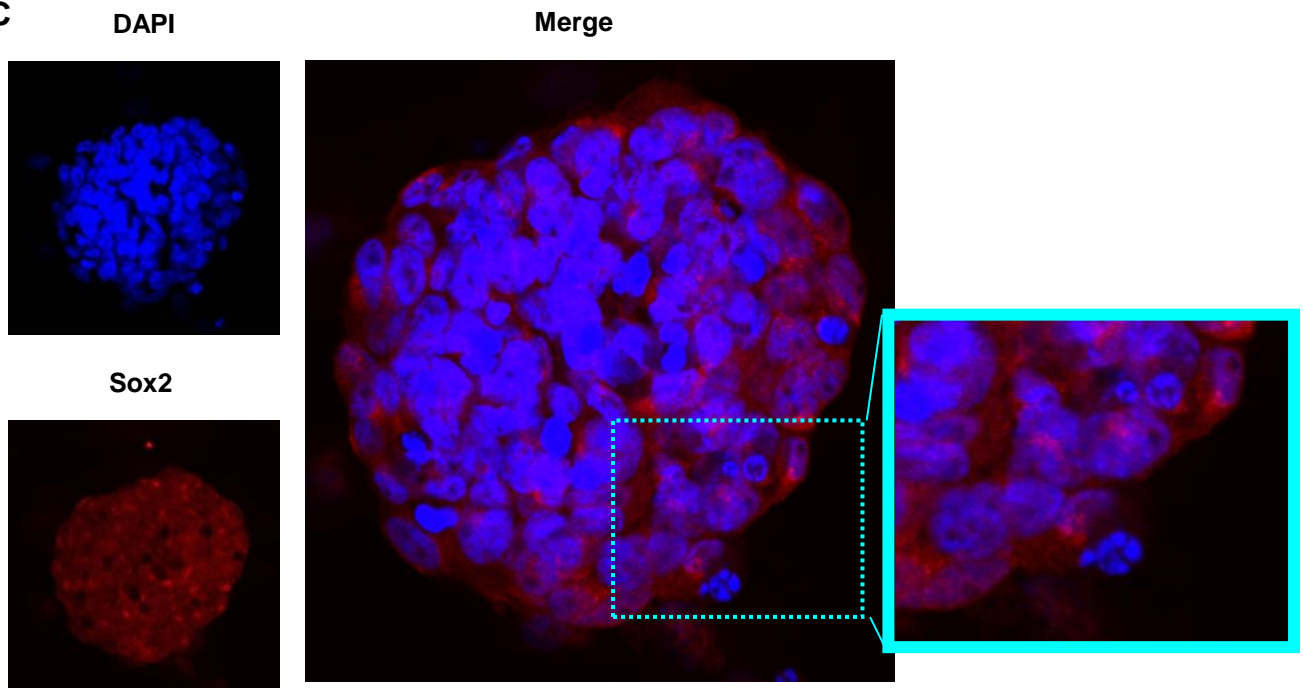**Figure S7**
