# Supplementary material for: Renal cancer: new models and approach for personalizing therapy
Source: Springer Nature journal article supplement (doi:10.1186/s13046-018-0874-4), 2018-09-05
Supplement: MOESM12 [file 16100066]

| PDX N° | SEX | G | T  | N | M | RECURENCE | TUMORGRAFTS |
|--------|-----|---|----|---|---|-----------|-------------|
| 1      | F   | 1 | 1b | x | 0 | NO        | NO          |
| 2      | M   | 1 | 1b | x | 0 | NO        | NO          |
| 3      | M   | 1 | 1b | x | 0 | NO        | NO          |
| 4      | M   | 2 | 1b | x | 0 | NO        | NO          |
| 5      | M   | 2 | 2a | x | 0 | YES       | YES         |
| 6      | M   | 2 | 1b | x | 0 | NO        | NO          |
| 7      | F   | 2 | 3a | x | 0 | NO        | NO          |
| 8      | F   | 2 | 2a | 0 | 0 | NO        | YES         |
| 9      | M   | 2 | 1b | x | 0 | NO        | NO          |
| 10     | M   | 2 | 2a | x | 0 | NO        | YES         |
| 11     | F   | 3 | 3a | 0 | 0 | NO        | YES         |
| 12     | M   | 3 | 1b | x | 0 | NO        | YES         |
| 13     | M   | 3 | 3a | 0 | 0 | YES       | NO          |
| 14     | F   | 3 | 1b | x | 0 | NO        | NO          |
| 15     | M   | 3 | 3a | x | 0 | NO        | NO          |
| 16     | F   | 3 | 1b | x | 0 | NO        | NO          |
| 17     | M   | 3 | 4  | 0 | 0 | YES       | YES         |
| 18     | M   | 3 | 2b | x | 0 | NO        | YES         |
| 19     | F   | 3 | 3a | 0 | 0 | YES       | YES         |
| 20     | F   | 3 | 1b | x | 0 | NO        | YES         |
| 21     | M   | 3 | 3b | 0 | 0 | YES       | YES         |
| 22     | F   | 3 | 3a | x | 1 | -         | YES         |
| 23     | M   | 3 | 1b | x | 0 | YES       | YES         |
| 24     | M   | 4 | 1b | x | 1 | -         | YES         |
| 25     | M   | 4 | 3a | 0 | 0 | YES       | NO          |
| 26     | M   | 4 | 4  | 0 | 1 | -         | YES         |
| 27     | M   | 4 | 4  | 1 | 0 | NO        | YES         |
| 28     | M   | 4 | 2a | x | 0 | NO        | YES         |
| 29     | M   | 4 | 4  | 0 | 0 | YES       | YES         |
| 30     | M   | 4 | 1b | x | 0 | YES       | YES         |

**Table S4**
