# Supplementary material for: Renal cancer: new models and approach for personalizing therapy
Source: Springer Nature journal article supplement (doi:10.1186/s13046-018-0874-4), 2018-09-05
Supplement: MOESM13 [file 16100066]

**Primary Tumor/  
epithelial phenotype**

**Primary Tumor/  
Sarcomatoid area**

**Xenograft**

**G4**

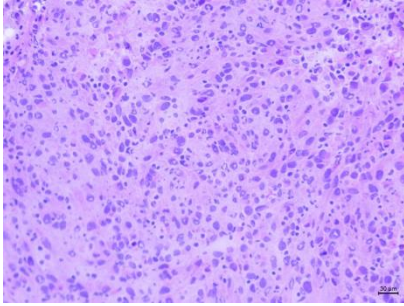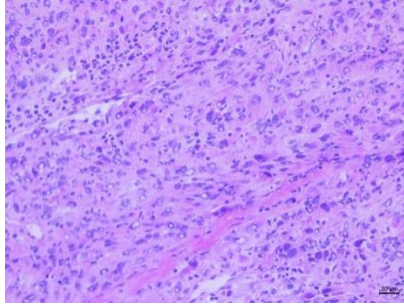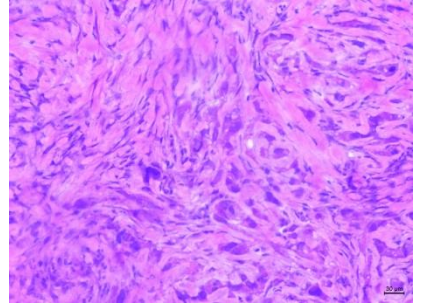

**Figure S9**
